# Supplementary material for: Two GdIII complexes derived from dicarboxylate ligands as cryogenic magnetorefrigerants
Source: Royal Society of Chemistry journal article supplement (doi:10.1039/c5nj01229e), 2015-01-01
Supplement: c5nj01229e1.pdf [file c5nj01229e1.pdf]

Electronic Supplementary Information (ESI) for *New Journal of  
Chemistry*

**Two Gd<sup>III</sup> complexes derived from dicarboxylate ligands as cryogenic  
magnetorefrigerants**

**Sui-Jun Liu, \*<sup>a</sup> Teng-Fei Zheng,<sup>a</sup> Jun Bao,<sup>a</sup> Piao-Ping Dong,<sup>a</sup> Jin-Sheng Liao,<sup>a</sup> Jing-Lin  
Chen,<sup>a</sup> He-Rui Wen,<sup>\*a</sup> Jian Xu<sup>\*b</sup> and Xian-He Bu<sup>b</sup>**

*<sup>a</sup>School of Metallurgical and Chemical Engineering, Jiangxi University of Science and  
Technology, Ganzhou 341000, Jiangxi Province, P.R. China*

*<sup>b</sup>Department of Chemistry, TKL of Metal- and Molecule-Based Material Chemistry and  
Collaborative Innovation Center of Chemical Science and Engineering (Tianjin), Nankai  
University, Tianjin 300071, P.R. China*

---

\*Corresponding author. (S.-J. Liu) E-mail: liusuijun147@163.com, Tel: +86-797-8312204

(H.-R. Wen) E-mail: wenherui63@163.com, Tel: +86-797-8312553

(J. Xu) E-mail: jxu@nankai.edu.cn, Tel: +86-22-23502458.

**Table S1.** Comparison of  $-\Delta S_m^{\max}$  (larger than  $37.0 \text{ J kg}^{-1} \text{ K}^{-1}$  with  $\Delta H \leq 9 \text{ T}$ ) among title complexes and  $\text{Gd}^{\text{III}}$  coordination polymers associated with potential molecular magnetorefrigerants.

| Complex                                                                                                                                                                  | $M_w/N_{\text{Gd}}$ | Magnetic interaction ( $\theta$ , K) | $-\Delta S_m^{\max}$ [ $\text{J kg}^{-1} \text{ K}^{-1}$ ] ( $\Delta H$ ) | $-\Delta S_m^{\max}$ [ $\text{mJ cm}^{-3} \text{ K}^{-1}$ ] |
|--------------------------------------------------------------------------------------------------------------------------------------------------------------------------|---------------------|--------------------------------------|---------------------------------------------------------------------------|-------------------------------------------------------------|
| $[\text{Gd}(\text{OH})\text{CO}_3]_{\infty}^{\text{S1}}$                                                                                                                 | 234.27              | AF (-1.05)                           | 66.4 (7 T)                                                                | 355                                                         |
| $\{\text{Gd}(\text{HCOO})_3\}_{\infty}^{\text{S2}}$                                                                                                                      | 292.30              | AF (-0.3)                            | 55.9 (7 T)                                                                | 215.7                                                       |
| $[\text{Gd}_6]_{\infty}^{\text{S3}}$                                                                                                                                     | 278.25              | AF (-5.50)                           | 46.6 (7 T)                                                                | 206.81                                                      |
| $[\text{Ln}_4(\text{SO}_4)_4(\mu_3\text{-OH})_4(\text{H}_2\text{O})_4]_{\infty}^{\text{S4}}$                                                                             | 288.34              | AF (-1.57)                           | 51.29 (7 T)                                                               | 198.85                                                      |
| $[\text{Gd}_4(\mu_4\text{-SO}_4)_3(\mu_3\text{-OH})_4(\mu_2\text{-C}_2\text{O}_4)(\mu_2\text{-H}_2\text{O})(\text{H}_2\text{O})_4] \cdot \text{H}_2\text{O}^{\text{S5}}$ | 295.33              | AF (-1.57)                           | 51.49 (7 T)                                                               | 190.46                                                      |
| $\{[\text{Gd}_6(\text{OH})_8(\text{suc})_5(\text{H}_2\text{O})_2] \cdot 4\text{H}_2\text{O}\}_{\infty}^{\text{S6}}$                                                      | 294.67              | AF (-2.15)                           | 48 (7 T)                                                                  | 143.52                                                      |
| $[\text{Gd}(\text{C}_4\text{O}_4)(\text{C}_2\text{O}_2)_{0.5}(\text{H}_2\text{O})_2]_{\infty}^{\text{S7}}$                                                               | 349.33              | AF (-0.18)                           | 44.0 (7 T)                                                                | 127.6                                                       |
| $[\text{Gd}(\text{HCOO})(\text{C}_8\text{H}_4\text{O}_4)]_{\infty}^{\text{S8}}$                                                                                          | 366.38              | AF (-0.45)                           | 47.0 (9 T)                                                                | 125.11                                                      |
| $\{[\text{Gd}_2(\text{OH})_2(\text{suc})_2(\text{H}_2\text{O})] \cdot 2\text{H}_2\text{O}\}_{\infty}^{\text{S6}}$                                                        | 317.36              | AF (-2.78)                           | 42.8 (7 T)                                                                | 120.48                                                      |
| $[\text{Gd}_2(\text{OH})_2(\text{oda})_2(\text{H}_2\text{O})_4]_{\infty}$ ( <b>1</b> )                                                                                   | 342.36              | AF (-1.06)                           | 43.3 (7 T)                                                                | 116.6                                                       |
| $[\text{Gd}(\text{cit})(\text{H}_2\text{O})]_{\infty}^{\text{S9}}$                                                                                                       | 363.36              | F (1.13)                             | 43.6 (7 T)                                                                | 115.23                                                      |
| $[\text{Gd}(\text{HCOO})(\text{OAc})_2(\text{H}_2\text{O})_2]_{\infty}^{\text{S10}}$                                                                                     | 356.38              | AF                                   | 45.9 (7 T)                                                                | 110.02                                                      |
| $[\text{Gd}(\text{OAc})_3(\text{H}_2\text{O})_{0.5}]_{\infty}^{\text{S11}}$                                                                                              | 343.39              | AF (-0.22)                           | 47.7 (7 T)                                                                | 106.28                                                      |
| $[\text{Gd}(\text{C}_4\text{O}_4)(\text{OH})(\text{H}_2\text{O})_4]_{\infty}^{\text{S12}}$                                                                               | 358.36              | AF (-0.12)                           | 43.8 (7 T)                                                                | 104.59                                                      |
| $\{[\text{Gd}_2(\text{IDA})_3] \cdot 2\text{H}_2\text{O}\}_{\infty}^{\text{S13}}$                                                                                        | 371.90              | AF (-0.90)                           | 40.6 (7 T)                                                                | 100.69                                                      |
| $[\text{Gd}(\text{OAc})_3(\text{MeOH})]_{\infty}^{\text{S11}}$                                                                                                           | 366.42              | F (0.34)                             | 45.0 (7 T)                                                                | 96.71                                                       |
| $\{[\text{Gd}(\text{fum})(\text{ox})_{0.5}(\text{H}_2\text{O})_2] \cdot 2\text{H}_2\text{O}\}_{\infty}$ ( <b>2</b> )                                                     | 387.38              | F (0.93)                             | 37.1 (7 T)                                                                | 93.4                                                        |
| $[\text{Gd}_3]_{\infty}^{\text{S14}}$                                                                                                                                    | 345.00              | AF (-2.43)                           | 39.66 (7 T)                                                               | 91.34                                                       |
| $[\text{Gd}_2(\text{piv})_5(\mu_3\text{-OH})(\text{H}_2\text{O})]_{\infty}^{\text{S9}}$                                                                                  | 427.57              | AF (-0.86)                           | 37.5 (7 T)                                                                | 61.13                                                       |

$$-\Delta S_m^{\max} [\text{mJ cm}^{-3} \text{ K}^{-1}] = -\Delta S_m^{\max} [\text{J kg}^{-1} \text{ K}^{-1}] * \rho_{\text{cald}} [\text{g cm}^{-3}]$$

## References

S1. Y.-C. Chen, L. Qin, Z.-S. Meng, D. Yang, C. Wu, Z. Fu, Y.-Z. Zheng, J.-L. Liu, R. Tarasenko, M. Orendáč, J.

Prokleska, V. Sechovský and M.-L. Tong, *J. Mater. Chem. A*, 2014, **2**, 9851-9858.

- S2. G. Lorusso, J. W. Sharples, E. Palacios, O. Roubeau, E. K. Brechin, R. Sessoli, A. Rossin, F. Tuna, E. J. L. McInnes, D. Collison and M. Evangelisti, *Adv. Mater.*, 2013, **25**, 4653-4656.
- S3. Y.-L. Hou, G. Xiong, P.-F. Shi, R.-R. Cheng, J.-Z. Cui and B. Zhao, *Chem. Commun.*, 2013, **49**, 6066-6068.
- S4. S.-D. Han, X.-H. Miao, S.-J. Liu and X.-H. Bu, *Chem. Asian J.*, 2014, **9**, 3116-3120.
- S5. S.-D. Han, X.-H. Miao, S.-J. Liu and X.-H. Bu, *Inorg. Chem. Front.*, 2014, **1**, 549-552.
- S6. Y.-C. Chen, F.-S. Guo, Y.-Z. Zheng, J.-L. Liu, J.-D. Leng, R. Tarasenko, M. Orendáč, J. Prokleška, V. Sechovský and M. L. Tong, *Chem. Eur. J.*, 2013, **19**, 13504-13510.
- S7. S. Biswas, H. S. Jena, A. Adhikary and S. Konar, *Inorg. Chem.*, 2014, **53**, 3926-3928.
- S8. R. Sibille, T. Mazet, B. Malaman and M. Francois, *Chem. Eur. J.*, 2012, **18**, 12970-12973.
- S9. S.-J. Liu, C.-C. Xie, J.-M. Jia, J.-P. Zhao, S.-D. Han, Y. Cui, Y. Li and X.-H. Bu, *Chem. Asian J.*, 2014, **9**, 1116-1122.
- S10. G. Lorusso, M. A. Palacios, G. S. Nichol, E. K. Brechin, O. Roubeau and M. Evangelisti, *Chem. Commun.*, 2012, **48**, 7592-7594.
- S11. F.-S. Guo, J.-D. Leng, J. L. Liu, Z. S. Meng and M. L. Tong, *Inorg. Chem.*, 2012, **51**, 405-413.
- S12. S. Biswas, A. Adhikary, S. Goswami and S. Konar, *Dalton Trans.*, 2013, **42**, 13331-13334.
- S13. J.-M. Jia, S.-J. Liu, Y. Cui, S.-D. Han, T.-L. Hu and X.-H. Bu, *Cryst. Growth Des.*, 2013, **13**, 4631-4634.
- S14. M. Wu, F. Jiang, X. Kong, D. Yuan, L. Long, S. A. Al-Thabaiti and M. Hong, *Chem. Sci.*, 2013, **4**, 3104-3109.

**Table S2.** Selected bond lengths (Å) and angles (°) for **1<sup>a</sup>**

|                                        |           |                           |          |
|----------------------------------------|-----------|---------------------------|----------|
| Gd1—O6                                 | 2.260(10) | Gd1—O1W                   | 2.437(9) |
| Gd1—O6 <sup>#1</sup>                   | 2.284(9)  | Gd1—O4                    | 2.439(7) |
| Gd1—O2 <sup>#2</sup>                   | 2.377(9)  | Gd1—O3                    | 2.508(7) |
| Gd1—O1                                 | 2.416(8)  | Gd1—O2W                   | 2.520(8) |
| O6—Gd1—O6 <sup>#1</sup>                | 66.2(3)   | O2 <sup>#2</sup> —Gd1—O4  | 78.3(3)  |
| O6—Gd1—O2 <sup>#2</sup>                | 83.0(4)   | O1—Gd1—O4                 | 126.6(2) |
| O6 <sup>#1</sup> —Gd1—O2 <sup>#2</sup> | 115.5(4)  | O1W—Gd1—O4                | 80.2(3)  |
| O6—Gd1—O1                              | 91.6(4)   | O6—Gd1—O3                 | 138.0(3) |
| O6 <sup>#1</sup> —Gd1—O1               | 87.5(4)   | O6 <sup>#1</sup> —Gd1—O3  | 78.7(3)  |
| O2 <sup>#2</sup> —Gd1—O1               | 151.1(3)  | O2 <sup>#2</sup> —Gd1—O3  | 134.9(3) |
| O6—Gd1—O1W                             | 145.7(3)  | O1—Gd1—O3                 | 63.6(2)  |
| O6 <sup>#1</sup> —Gd1—O1W              | 148.1(3)  | O1W—Gd1—O3                | 71.6(3)  |
| O2 <sup>#2</sup> —Gd1—O1W              | 79.6(3)   | O4—Gd1—O3                 | 63.4(2)  |
| O1—Gd1—O1W                             | 89.7(3)   | O6—Gd1—O2W                | 75.7(3)  |
| O6—Gd1—O4                              | 124.6(3)  | O6 <sup>#1</sup> —Gd1—O2W | 138.2(3) |
| O6 <sup>#1</sup> —Gd1—O4               | 76.1(3)   | O2 <sup>#2</sup> —Gd1—O2W | 74.4(3)  |
| O4—Gd1—O2W                             | 143.4(3)  | O1—Gd1—O2W                | 76.7(3)  |
| O3—Gd1—O2W                             | 124.6(3)  | O1W—Gd1—O2W               | 71.3(3)  |

<sup>a</sup>Symmetry code: #1: -x+2, -y, -z+2; #2: x, y-1, z.

**Table S3.** Selected bond lengths (Å) and angles (°) for **2<sup>a</sup>**

|                                         |            |                                         |            |
|-----------------------------------------|------------|-----------------------------------------|------------|
| Gd1—O1 <sup>#1</sup>                    | 2.352(3)   | Gd1—O3                                  | 2.443(3)   |
| Gd1—O2                                  | 2.474(3)   | Gd1—O1W                                 | 2.472(3)   |
| C2—O1—Gd1 <sup>#1</sup>                 | 156.1(3)   | O1 <sup>#2</sup> —Gd1—O2 <sup>#3</sup>  | 107.32(11) |
| O1 <sup>#2</sup> —Gd1—O1 <sup>#1</sup>  | 144.99(14) | O1 <sup>#1</sup> —Gd1—O2 <sup>#3</sup>  | 83.81(11)  |
| O1 <sup>#2</sup> —Gd1—O3 <sup>#3</sup>  | 140.53(9)  | O3 <sup>#3</sup> —Gd1—O2 <sup>#3</sup>  | 70.71(10)  |
| O1 <sup>#1</sup> —Gd1—O3 <sup>#3</sup>  | 74.40(9)   | O3—Gd1—O2 <sup>#3</sup>                 | 78.62(10)  |
| O1 <sup>#2</sup> —Gd1—O3                | 74.40(9)   | O1W <sup>#3</sup> —Gd1—O2 <sup>#3</sup> | 72.80(10)  |
| O1 <sup>#1</sup> —Gd1—O3                | 140.53(9)  | O1W—Gd1—O2 <sup>#3</sup>                | 143.61(10) |
| O3 <sup>#3</sup> —Gd1—O3                | 66.50(12)  | O2—Gd1—O2 <sup>#3</sup>                 | 143.22(14) |
| O1 <sup>#2</sup> —Gd1—O1W <sup>#3</sup> | 77.21(11)  | O1 <sup>#2</sup> —Gd1—O1W               | 74.68(11)  |
| O1 <sup>#1</sup> —Gd1—O1W <sup>#3</sup> | 74.68(11)  | O1 <sup>#1</sup> —Gd1—O1W               | 77.21(11)  |
| O3 <sup>#3</sup> —Gd1—O1W <sup>#3</sup> | 133.97(10) | O3 <sup>#3</sup> —Gd1—O1W               | 130.96(10) |
| O3—Gd1—O1W <sup>#3</sup>                | 130.96(10) | O3—Gd1—O1W                              | 133.97(10) |
| O3 <sup>#3</sup> —Gd1—O2                | 78.62(10)  | O1W <sup>#3</sup> —Gd1—O1W              | 72.37(14)  |
| O3—Gd1—O2                               | 70.71(10)  | O1 <sup>#2</sup> —Gd1—O2                | 83.81(11)  |
| O1W <sup>#3</sup> —Gd1—O2               | 143.61(10) | O1 <sup>#1</sup> —Gd1—O2                | 107.32(11) |
| O1W—Gd1—O2                              | 72.80(10)  |                                         |            |

<sup>a</sup>Symmetry code: #1:  $-x+3/2, -y+1/2, -z+1$ ; #2:  $x-1/4, y-1/4, -z+1$ ; #3:  $-x+5/4, -y+1/4, z$ .

**Table S4.** Hydrogen-Bonding Geometry (Å, °) for **1**

| D—H···A       | D—H      | H···A    | D···A     | D—H···A |
|---------------|----------|----------|-----------|---------|
| O1W—H1WA···O5 | 0.87     | 2.09     | 2.760(12) | 133     |
| O1W—H1WB···O5 | 0.87     | 1.89     | 2.699(12) | 154     |
| O2W—H2WB···O4 | 0.87     | 2.36     | 3.119(14) | 146     |
| O6—H6···O1    | 0.85(11) | 2.47(10) | 3.285(13) | 162(12) |
| C2—H2A···O4   | 0.97     | 0.97     | 3.159(14) | 131     |

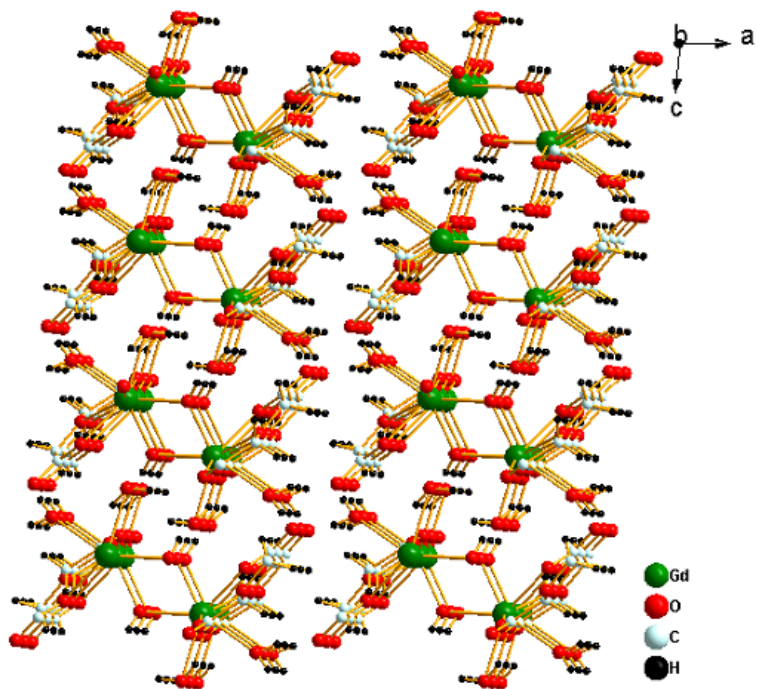

Fig. S1. View of the 3D packing structure of 1.

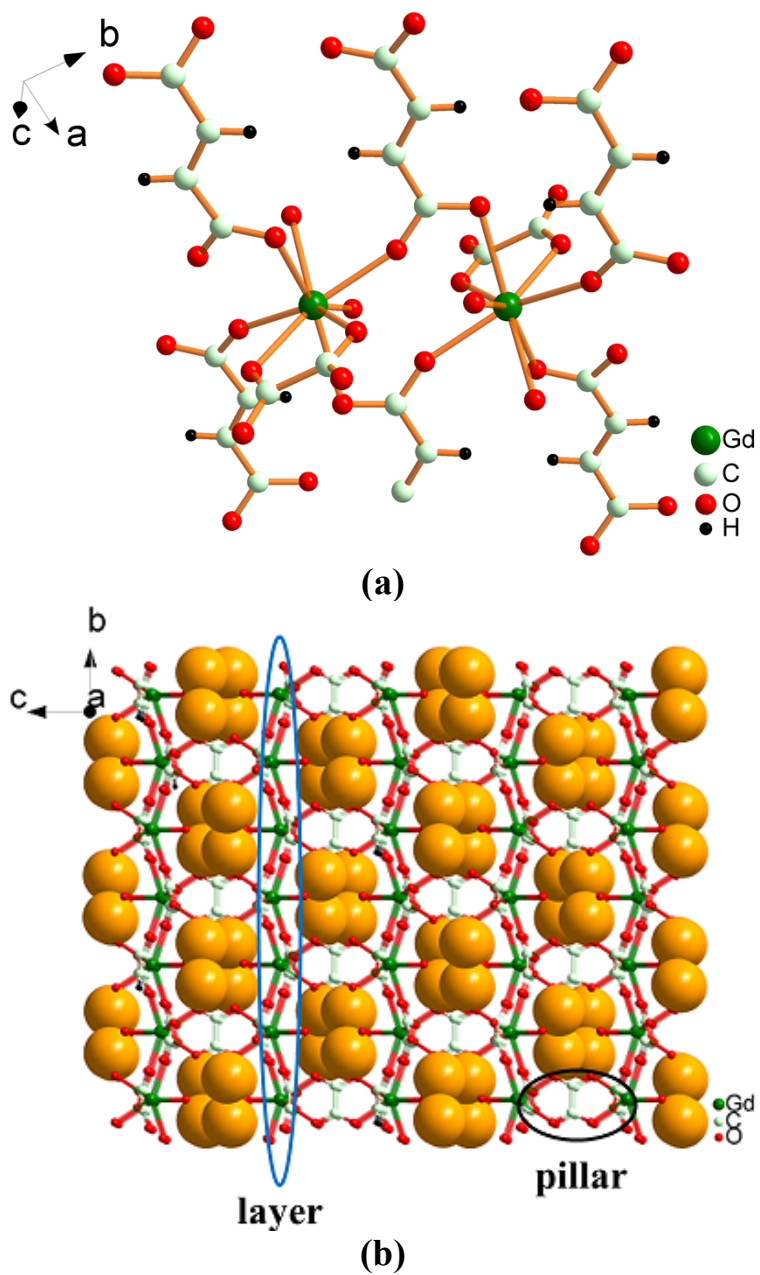

**Fig. S2.** (a) The coordination environment of Gd<sup>III</sup> ions in **2**; (b) the 3D pillar-layer structure of **2**.

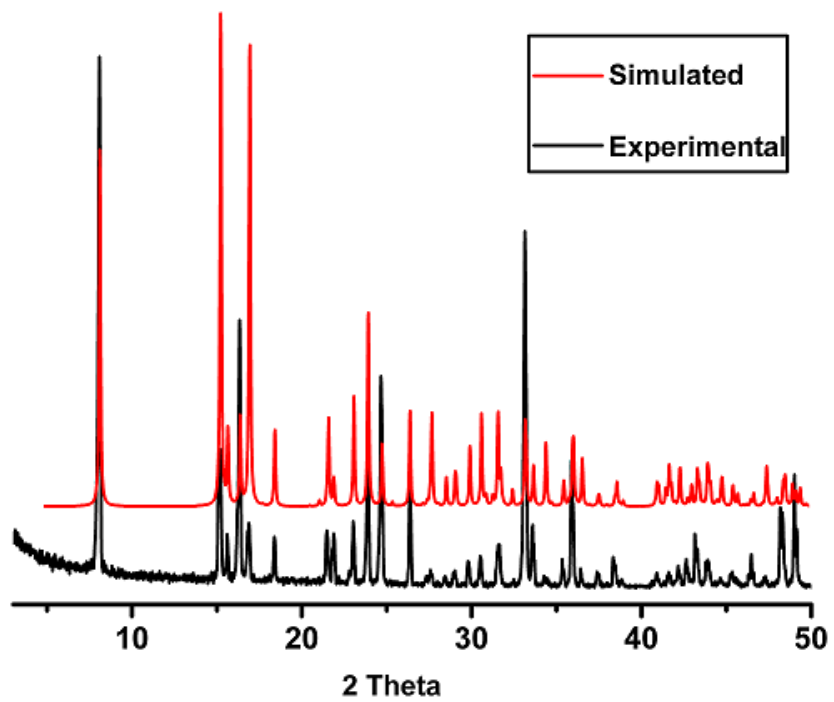

(a)

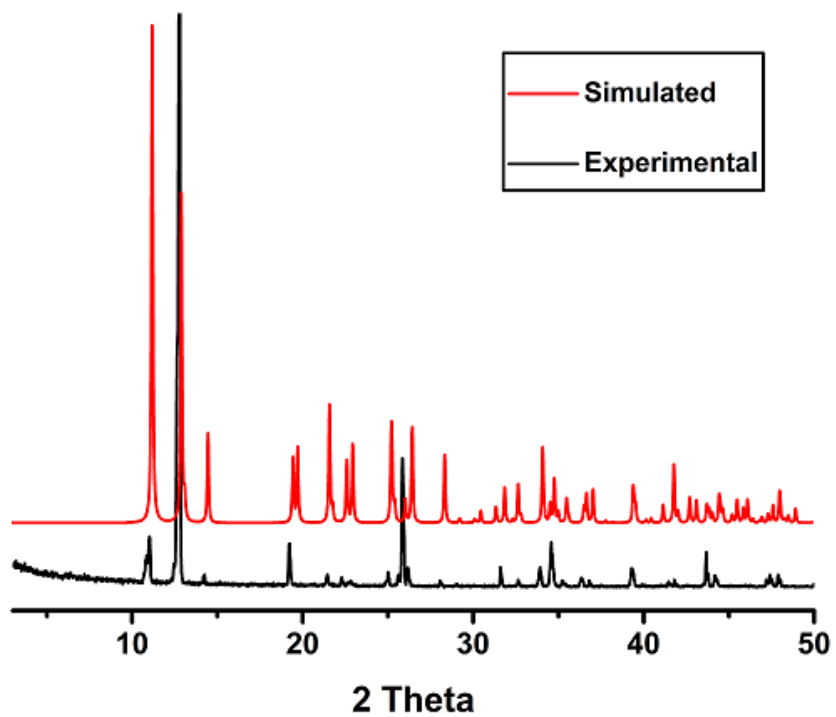

(b)

Fig. S3. PXR D patterns of 1 (a) and 2 (b).



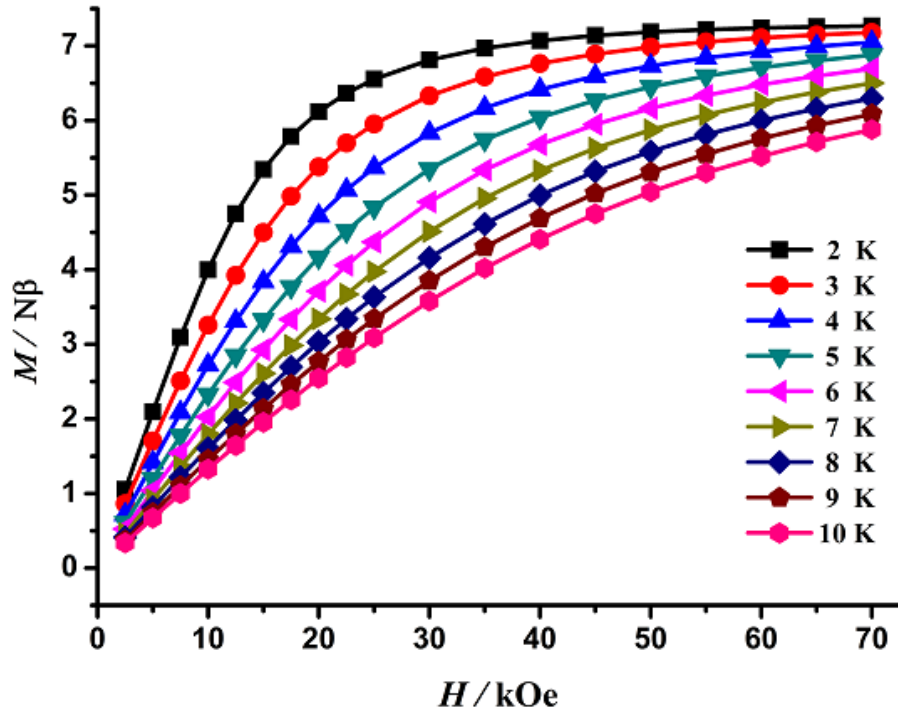

(a)

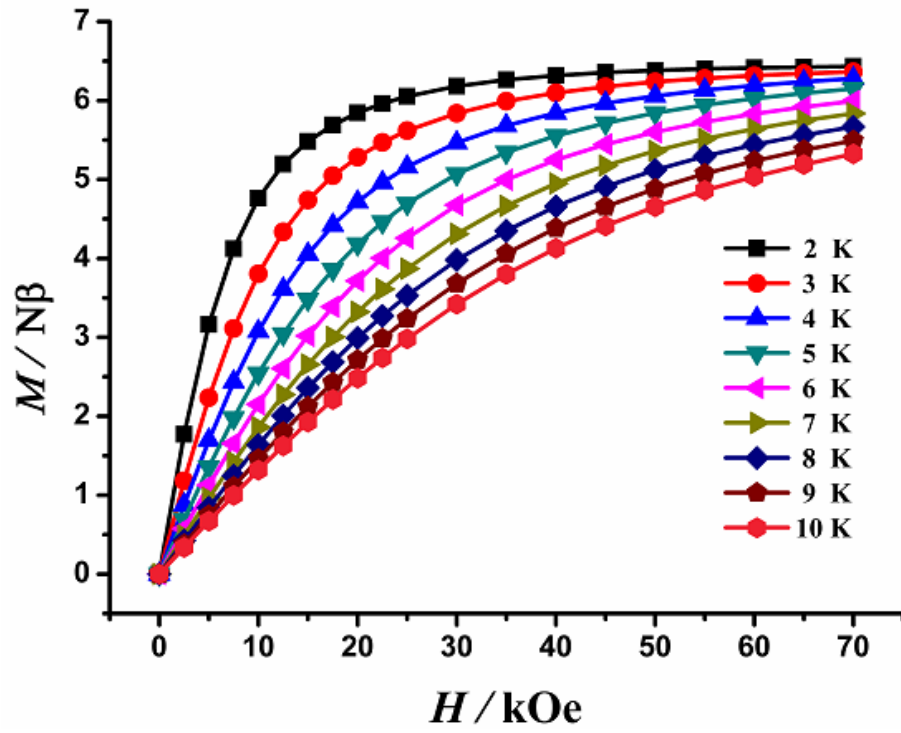

(b)

Fig. S4. The  $M$  vs.  $H$  curves of 1 (a) and 2 (b) at  $T = 2\text{--}10$  K and  $H = 2.5\text{--}70$  kOe

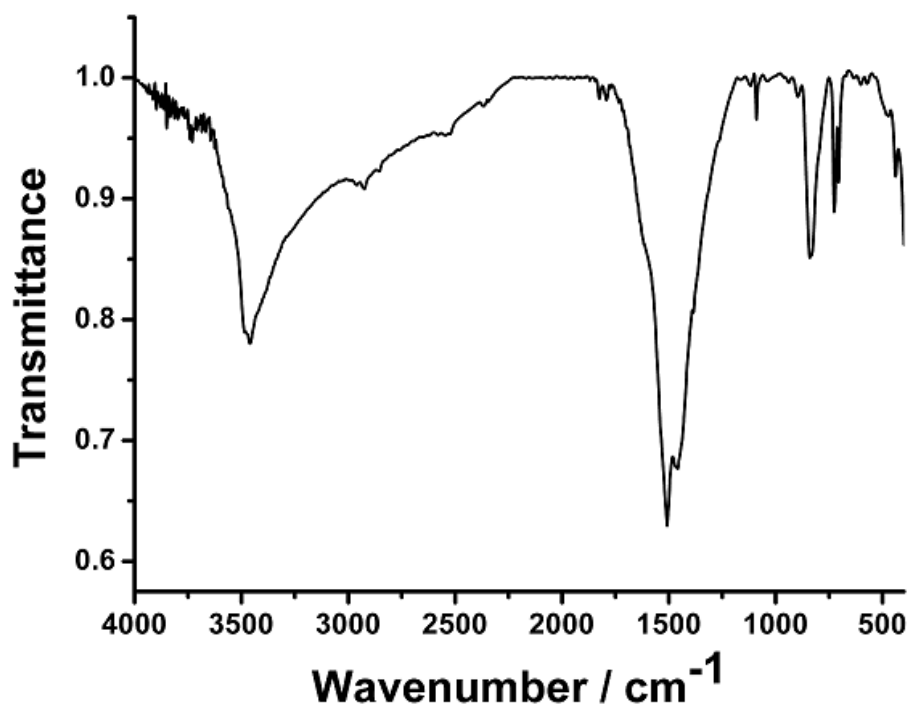

(a)

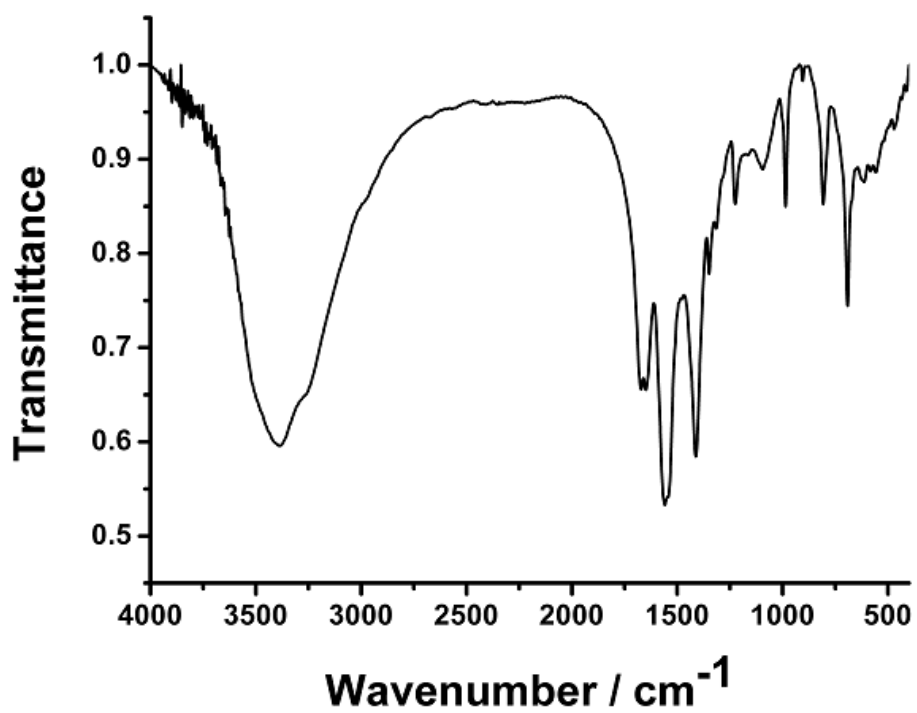

(b)

Fig. S5. IR spectra of 1 (a) and 2 (b).
